1 **Human macrophage polarization determines bacterial**  
2 **persistence of *Staphylococcus aureus* in a liver-on-chip-**  
3 **based infection model**

4

5 Fatina Siwczak <sup>1</sup>, Zoltan Cseresnyes <sup>2</sup>, Swen Carlstedt <sup>1</sup>, Anke Sigmund <sup>3</sup>, Marko Gröger <sup>1</sup>,  
6 Bas G.J. Surewaard <sup>4,5</sup>, Oliver Werz <sup>6</sup>, Marc Thilo Figge <sup>2,7</sup>, Lorena Tuchscher <sup>3</sup>, Bettina  
7 Löffler <sup>3</sup>, Alexander S. Mosig <sup>1,\*</sup>

8

9 <sup>1</sup> Institute of Biochemistry II, Center for Sepsis Control and Care, Jena University Hospital,  
10 07747 Jena, Germany

11

12 <sup>2</sup> Applied Systems Biology Research Group, Leibniz Institute for Natural Product Research  
13 and Infection Biology-Hans Knöll Institute (HKI), 07745 Jena, Germany.

14

15 <sup>3</sup> Institute of Medical Microbiology, Jena University Hospital, 07747 Jena, Germany

16

17 <sup>4</sup> Snyder Institute for Chronic Diseases, Cumming School of Medicine, University of Calgary,  
18 Calgary, Alberta, Canada.

19

20 <sup>5</sup> Department of Microbiology, Immunology and Infectious Diseases, Cumming School of  
21 Medicine, University of Calgary, Calgary, Alberta, Canada.

22

23 <sup>6</sup> Department of Pharmaceutical/Medicinal Chemistry, Institute of Pharmacy, Friedrich  
24 Schiller University Jena, Jena, Germany.

25

26 <sup>7</sup> Institute of Microbiology, Faculty of Biological Sciences, Friedrich Schiller University Jena,  
27 Jena, Germany

28

29 \* *Corresponding author:* Alexander S. Mosig, Email: [alexander.mosig@med.uni-jena.de](mailto:alexander.mosig@med.uni-jena.de)

30

31 *Key words:* macrophages, *Staphylococcus aureus*, persistence, macrophage polarization,

32 liver, organ-on-chip

## 33 **Abstract**

34

35 Infections with *Staphylococcus aureus* (*S. aureus*) have been reported from various organs  
36 ranging from asymptomatic colonization to severe infections and sepsis associated with  
37 multiple organ dysfunction. Although considered an extracellular pathogen, *S. aureus* can  
38 invade and persist in professional phagocytes such as monocytes and macrophages. Its  
39 capability to persist and manipulate phagocytes is considered a critical step to evade host  
40 antimicrobial reactions. For the first time we leveraged a human liver-on-chip model and  
41 tailored image analysis algorithms to demonstrate that *S. aureus* (USA300) specifically targets  
42 macrophages in the liver models as essential niche facilitating bacterial persistence and  
43 phenotype switching to small colony variants (SCVs). *In vitro* M2 polarization was found to  
44 favor SCV-formation and was associated with increased intracellular bacterial loads in  
45 macrophages, increased cell death, and impaired recruitment of circulating monocytes to sites  
46 of infection. These findings expand the knowledge about the role of liver macrophages in the  
47 course of systemic infection. Further, the results might be relevant for understanding infection  
48 mechanisms in patients with chronic liver disease such as fibrosis that display increased  
49 frequencies of M2 polarized liver macrophages and have a higher risk for developing chronic  
50 infections and relapsing bacteremia.

## 51 **Introduction**

52

53 *Staphylococcus aureus* (*S. aureus*) is a gram-positive bacterium representing an important  
54 human pathogen in community and hospital-acquired infections. Invasive infections can be  
55 associated with multiple organ dysfunction and prolonged treatment requirements [1]. Further,  
56 antibiotic resistance of invasive methicillin-resistant *S. aureus* (MRSA) complicates treatment  
57 of *S. aureus* infections associated with a high mortality rate of approximately 20% [2]. Infections  
58 with *S. aureus* are thus a leading cause of death in developed countries [3], with the MRSA  
59 strain USA300 reaching pandemic status across North America [4]. To date, no approved  
60 vaccine for *S. aureus* infections is available [5].

61

62 Various cell types, including non-professional phagocytes (such as endothelial, epithelial cells  
63 and keratinocytes), and professional phagocytes (e.g., macrophages), have been reported to  
64 provide shelter for intracellular persisting *S. aureus* [6]. In particular, macrophages have been  
65 identified as a privileged environmental niche for *S. aureus* persistence, offering protection  
66 from antimicrobial activity and detection by immune cells. *S. aureus* has been reported to  
67 manipulate macrophage activation for its own survival [7].

68

69 With a blood perfusion rate of more than one liter per minute, the liver is not only among the  
70 most intensively perfused organs of the human body but also a central organ for filtering blood-  
71 borne infections as it harbors 80% of all tissue-resident macrophages (Kupffer cells, KCs) [8].  
72 KCs are located within the sinusoids with optimal access to pathogens arriving in the liver.  
73 They are critical effectors of the early innate immune response by facilitating phagocytosis and  
74 killing bacteria from the bloodstream [8a]. KCs thus likely represent a crucial reservoir for  
75 intracellular persistence of *S. aureus* [9]. Indeed, 90% of *S. aureus* are sequestered from the  
76 blood by the liver and effectively killed by KCs [10], but a small fraction of these bacteria  
77 manage to survive intracellularly. Macrophages have been shown to have a finite capacity for  
78 intracellular killing of *S. aureus* when exposed to large inocula. The bacteria can then persist

79 intracellularly in vacuoles of macrophages for several days before escaping into the cytoplasm  
80 and eventually causing host cell lysis [6d, 11]. Very few bacteria can escape from  
81 macrophages, which can be sufficient to establish a tissue infection abscesses [11b, 12]. In  
82 this context, it has been postulated that macrophages might represent an important bottleneck  
83 triggering a bacterial variant enrichment to improve the pathogens' persistence and spread  
84 within the body subsequently. The formation of SCVs is part of the normal bacterial life cycle  
85 of *S. aureus*, i.e., as a response to starvation. However, the formation of SCVs has also been  
86 linked to antibiotic treatment, response to antimicrobial host peptides, and the pathogenesis of  
87 chronic and recurrent infections [13]. SCVs can revert from a quiescent metabolic state to the  
88 normal parental phenotype, which can induce recurrent infections [13-14]. The unstable SCV  
89 phenotype switching has been further linked to the development of antibiotic tolerance  
90 associated with a reduced bacterial growth rate [15]. The intracellular milieu has been thought  
91 of as an essential trigger of SCV formation [6a].

92  
93 In a simplified model, macrophage activation has been categorized *in vitro* into the pro-  
94 inflammatory M1 and the anti-inflammatory M2 phenotype. M1 polarization is associated with  
95 the release of pro-inflammatory cytokines and mainly microbicidal activity as a primary  
96 antibacterial defense mechanism [16]. The M2 polarization has mainly been described under  
97 homeostatic conditions and in later stages of infection. It is associated with an anti-  
98 inflammatory profile and poor microbicidal capacity to restrain inflammation and induce tissue  
99 repair [17]. To elucidate the role of macrophage polarization in the liver on persistence, SCV  
100 formation, and dissemination of *S. aureus*, we leveraged a recently developed *in vitro* model  
101 of the human liver. The liver-on-chip is composed of endothelial cells, hepatocytes, and  
102 macrophages, enabling studies on the mutual interaction between the pathogen and most  
103 essential cell types of the liver (Figure 1). Our studies revealed that *S. aureus* (strain USA300)  
104 could specifically target macrophages and subvert them as an essential niche for bacterial  
105 persistence, replication, and phenotype switching. We demonstrate that M2 macrophage  
106 polarization favors SCV phenotype formation that is associated with increased intracellular

107 bacterial loads. Interestingly, the SCV formation was not observed in mono-cell cultures of  
108 macrophages nor liver-on-chip without cocultured macrophages. 48h post-infection (p.i.), we  
109 found an increased number of bacteria persisting in interleukin-4 polarized M2 macrophages  
110 compared to non-activated (M0) or interferon-activated M1 macrophages. The increased  
111 bacterial burden in M2 macrophage was associated with increased cell death, a drop in  
112 albumin synthesis by hepatocytes, and impaired replenishment of macrophages through  
113 disturbed recruitment of circulating monocytes.

114

## 115 **Materials and Methods**

116

### 117 *Biochips*

118

119 Microfluidic biochips were made from polybutylenterephthalat (PBT) and obtained from  
120 Dynamic42 GmbH (Jena, Germany). Biochips were manufactured by injection molding as  
121 described elsewhere [18]. The chamber above the membrane has a height of 700  $\mu\text{m}$ ; the  
122 chamber under the membrane has a height of 400  $\mu\text{m}$ . The width of the afferent and efferent  
123 channels is 0.8 mm and 2 mm, respectively. The height of these channels is 0.6 mm and 0.4  
124 mm, respectively. The upper and the lower chamber, including channel systems, have a  
125 volume of 220  $\mu\text{l}$  and 120  $\mu\text{l}$ , respectively. A 12  $\mu\text{m}$  thin polyethylene terephthalate (PET)  
126 membrane with a pore diameter of 8  $\mu\text{m}$  and a pore density of  $1 \times 10^5$  pores/ $\text{cm}^2$  (TRAKETCH  
127 Sabeu, Radeberg, Germany) was integrated. An area of 1.1  $\text{cm}^2$  is available for cell culture.  
128 Chips and channels structures were sealed on top and bottom side with an extruded 140  $\mu\text{m}$   
129 thin Polystyrene (PS) foil using a laser welding-based proprietary bonding method. Gas  
130 permeable silicon tubing was used for perfusion, allowing oxygen equilibration during  
131 experiments. Ramping structures have been introduced into the chip bulk to prevent  
132 unfavorable flow conditions and trapping of stationary air bubbles. The biochip was perfused  
133 using peristaltic pumps (Ismatec REGLO digital MS-CA-4/12-100, Wertheim, Germany)

134 *Ethics*

135 The study was approved by the ethics committee of the Jena University Hospital (2020–  
136 1684, 3939-12/13), and all donors were informed about the aim of the study and gave written  
137 consent.

138

139 *Cell culture*

140

141 Human umbilical vein endothelial cells (HUVECs) were isolated from human umbilical cord  
142 veins as described previously [19], cultured at a density of  $3 \times 10^5$  HUVEC's/cm<sup>2</sup> in endothelial  
143 cell growth medium (Endothelial Cell Medium, PromoCell, Heidelberg, Germany) with  
144 supplement. Donors were informed about the aim of the study and gave written consent.  
145 HUVECs were used until passage two. HepaRG cells were obtained from Biopredic  
146 International (Rennes, France). Cells were seeded at a density of  $2.7 \times 10^4$  cells/cm<sup>2</sup> and  
147 cultured in William's Medium E (Biochrom, Berlin, Germany) containing 10% (v/v) FCS (Life  
148 Technologies, Darmstadt, Germany), 5 mg/ml insulin (Sigma Aldrich, Steinheim, Germany), 2  
149 mM glutamine (GIBCO, Darmstadt, Germany), 50 μM hydrocortisone-hemisuccinate (Sigma-  
150 Aldrich) and 100 U/ml Penicillin/100 mg/ml Streptomycin mixture (Pen/Strep) (GIBCO). The  
151 cells were cultured in a humidified cell incubator at 5% CO<sub>2</sub> and 37°C for 14 days before  
152 differentiation. The medium was renewed every 3-4 days. Cell differentiation was induced as  
153 described [20], and cells were used for up to 4 weeks. Monocyte-derived macrophages were  
154 isolated as described previously [21]. Briefly, peripheral blood mononuclear cells (PBMCs)  
155 were isolated by Ficoll density gradient centrifugation as described previously [22] and seeded  
156 at a density of  $1 \times 10^6$  cells/cm<sup>2</sup> in X-VIVO 15 medium (Lonza, Cologne, Germany)  
157 supplemented with 10% (v/v) autologous human serum. After 3 h incubation in a humidified  
158 cell incubator at 5% CO<sub>2</sub> and 37°C, the cells were washed twice with X-VIVO 15 medium.  
159 Adherent monocytes were cultivated for 24 h in X-VIVO 15 medium and subsequently cultured  
160 in the liver model.

161

162 *Liver-on-chip*

163

164 Liver models were assembled by staggered seeding of vascular and hepatic cell layers. In  
165 each sterilized biochip,  $2.7 \times 10^5$  HUVECs/cm<sup>2</sup> and  $1 \times 10^5$  monocytes/cm<sup>2</sup> were mixed and  
166 seeded on top of the membrane. HUVEC/monocytes were cocultured for five days with a daily  
167 medium exchange with vascular perfusion medium: endothelial cell medium supplemented  
168 with 20% autologous human serum, 10 ng/ml human granulocyte-macrophage colony-  
169 stimulation factor (GM-CSF) (Peprotech), and 10 ng/ml human macrophage colony-stimulating  
170 factor (M-CSF) (Peprotech) to induce macrophage differentiation. Subsequently,  $2.7 \times 10^5$ /cm<sup>2</sup>  
171 HepaRG were seeded on the membrane opposite to endothelial cells and macrophages and  
172 the HepaRG containing chamber filled with William's E Medium (Biochrom) supplemented with  
173 2 mM glutamine (GIBCO), Insulin (Sigma-Aldrich), hydrocortisone-hemisuccinate 50  $\mu$ M  
174 (Sigma-Aldrich), 10% autologous serum. The chip was placed with HepaRG facing upward  
175 overnight to facilitate cell adhesion to the membrane. After one day of HepaRG attachment,  
176 the chip was flipped back, and perfusion was started at the vascular cavity with a flow rate of  
177 50  $\mu$ l/min. Medium at the lower chamber containing HepaRG was changed to hepatic  
178 cultivation medium: William's E Medium (Biochrom) containing 2 mM glutamine (GIBCO), 0.5  
179  $\mu$ g/ml insulin ((Sigma Aldrich), hydrocortisone-hemisuccinate 50  $\mu$ M (Sigma-Aldrich), 10%  
180 autologous human serum and 0.1% DMSO. The hepatic chamber was not perfused but  
181 medium was renewed daily.

182

183 *Macrophage polarization*

184

185 Macrophages were allowed to differentiate within the endothelial layer for five days post-  
186 seeding. Macrophage polarization to M1 was induced by stimulation with 10 ng/ml IFN $\gamma$   
187 (Peprotech) or to M2 by stimulation with 10 ng/ml IL-4 (Peprotech) for two days. Polarization  
188 was performed by supplementing cytokines to the vascular perfusion medium, which was  
189 replaced by cytokine-free media immediately before infection (Supplementary Figure 1a).



190

191 *S. aureus* culture

192

193 On the day of infection with living *S. aureus*, 1 ml of bacteria suspension from overnight culture  
194 was transferred to a 9 ml fresh MH medium containing 10µg/ml chloramphenicol and incubated  
195 at 37°C shaking for 3 h. Bacteria were pelleted and resuspended in PBS and adjusted to an  
196 optical density of 0.01. The number of bacteria determined by colony-forming unit (CFU)  
197 assays before and in parallel to each experiment in biological duplicates & technical triplicates.  
198 The multiplicity of infection (MOI) was calculated as the number of bacteria per cultured  
199 eukaryotic cell.

200

201 *Infection of liver-on-chip*

202

203 Infection was performed at the vascular side of the liver-on-chip model with an MOI = 5  
204 (referenced to endothelial cells and macrophages). Briefly, liver-on-chip devices were perfused  
205 with vascular perfusion medium containing bacteria for 90 min at 50 µl/min flow rate.  
206 Subsequently, extracellular bacteria were killed and removed by treatment with 20 µg/ml  
207 lysostaphin (WAK-Chemie Medical GmbH, Steinbach/Ts., Germany) for 30 min at the vascular  
208 and hepatic side of the model. Lysostaphin was washed away with vascular perfusion medium  
209 and hepatic cultivation medium, respectively. Infection was maintained for the indicated time  
210 points and flow conditions (50 µl/ml vascular perfusion). Vascular perfusion was stopped less  
211 than 5 min once a day for hepatic culture media exchange. Supernatants for CFU analysis  
212 were sampled at all indicated time points from the vascular perfusion stream and the hepatic  
213 chamber cultured under static conditions.

214

215 To analyze intracellular persisting bacteria, lysostaphin treatment was performed immediately  
216 before all cells of the liver-on-chip were lysed. Briefly, the membrane of the liver-on-chip was  
217 cut out, rinsed twice with PBS, and incubated in 0.5 ml PBS containing 0.25% Trypsin/EDTA

218 (GIBCO, Germany) for 30 min at 37°C and 5% CO<sub>2</sub>. Subsequently, 1 ml ddH<sub>2</sub>O was added,  
219 harshly mixed, and centrifuged for 10 min at 13,000xg. Pellets containing living bacteria were  
220 resuspended in 0.5 ml PBS and plated as triplicates in serial dilution. CFU were counted 24,  
221 48, and 72 post-plating, and CFUs determined and analyzed for the formation of small colony  
222 variants (SCV).

223

#### 224 *Cytokine profiling*

225

226 According to the manufacturer's instructions, cytokines were measured from effluent at the  
227 vascular side using multiplex bead-based immunoassays (LEGENDplex, BioLegend,  
228 SanDiego, CA, USA). All samples were measured in duplicates for every donor and  
229 experiment using a BD Canto II flow cytometer (BD, Heidelberg, Germany). Data analysis was  
230 performed with LEGENDplex™ data analysis software (BioLegend, SanDiego, CA, USA).

231

#### 232 *Monocyte recruitment assay*

233

234 Monocytes were perfused in the absence or presence of suspended bacteria at a flow rate of  
235 50 µl/min for 1 h through the liver-on-chip. 2.5 x 10<sup>5</sup> monocytes were labeled with CellTracker™  
236 Orange CMTMR Dye (ThermoFisher Scientific) according to manufactures recommendations,  
237 washed with PBS, and resuspended in 3 ml vascular perfusion medium. Flow through  
238 containing non adhesive monocytes was collected and monocytes treated with Lysostaphine  
239 for 30min, washed, and plated for CFU assay.

240

#### 241 *Immunofluorescence staining*

242

243 The following antibodies were used for staining: rabbit CD68 (BD Bioscience), goat epithelial  
244 cadherin (E-cadherin) (Thermo Fisher Scientific); donkey immunoglobulin (Ig)G anti-mouse  
245 IgG-Cy3, donkey IgG F(ab`), anti-rabbit IgG-AF488 (all obtained from Dianova, Hamburg,

246 Germany). The membrane containing cell layers were removed from the biochip by carefully  
247 moving a scalpel along the edge of the cavity. The membrane was rinsed twice with PBS  
248 containing  $\text{Ca}^{2+}$  and  $\text{Mg}^{2+}$  (Lonza) and subsequently fixed with pre-cooled methanol at  $-20\text{ }^{\circ}\text{C}$   
249 for 10 min. Cell layers were fixed with 4% PFA. Blocking and permeabilization were done with  
250 PBS with 3% normal donkey serum (Dianova) 0.1% saponin (Sigma-Aldrich, Germany) for 45  
251 min at RT. Primary antibodies were incubated overnight. The second antibody and DAPI were  
252 incubated after carefully washing twice with PBS and once with PBS/0.1 % saponin and  
253 incubated for 30 min at RT. Cells were washed four times with PBS containing  $\text{Ca}^{2+}$  and  $\text{Mg}^{2+}$   
254 and mounted in a fluorescent mounting medium (DAKO, CA, USA). Finally, images were  
255 recorded at an AXIO Observer Z1 fluorescence microscope with an Apotome 2 extension (Carl  
256 Zeiss AG, Jena, Germany).

257

#### 258 *Image analysis*

259

260 Initially, an optical sectioning processing was carried out using ZEN 2 blue software (Carl Zeiss  
261 AG, Oberkochen, Germany) to provide images for further analysis as Z-stacks in the native  
262 Zeiss image format "CZI ". The Huygens Professional software (SVI, Hilversum, Holland) was  
263 used to deconvolve the CZI Z-stack images, utilizing the spinning disk deconvolution module  
264 at  $4\text{ }\mu\text{m}$  pinhole spacing (see the SVI guidelines for handling Apotome image data). The  
265 deconvolved image stacks were segmented and quantified in Imaris 9.5.0, 9.5.1. or 9.6.0  
266 (Bitplane, Zürich, Switzerland) according to the workflow in Supplementary Figure 2. The  
267 macrophages were reconstructed from the membrane-specific volume label together with the  
268 corresponding E-cadherin signal (Figure 2a-b). To segment the endothelial cells and the  
269 hepatocytes, the membrane locations were revealed by intensity-thresholding the E-, VE-  
270 cadherin and ZO-1 volume signals (Figure 2a-b). The membranes were reconstructed both as  
271 Surfaces (Figure 3b) and Cells objects (Figure 3c; for details on how the parameters were set  
272 up in Imaris for the membrane (Surfaces objects)- and cell-based (Cells objects) segmentation,  
273 see [23]). For the Cells objects, the DAPI channel served as guidance for the Nucleus

274 component (Supplementary Figure 2); at the same time, the Cells objects were also  
275 reconstructed without nuclei in cases where the DAPI labeling was either not available or not  
276 necessary (Figure 2c). From the Cells objects, the membrane component was exported out  
277 individually, in order to be able to use them as Surfaces for masking and for counting the  
278 bacterial content in and/or near the endo- or epithelial cells (Figure 2c). The bacteria were  
279 exported out of the Cells module as "Vesicles" that were saved as Spots for further analysis  
280 (e.g., neighborhood density measurements).

281

### 282 *Statistical analysis*

283

284 Statistical analysis was performed using GraphPad Prism software version 9.12 (GraphPad  
285 Software, La Jolla, CA, USA). One-way ANOVA analysis was performed with Dunnett's  
286 correction for multiple comparisons. Two-way ANOVA was performed with Tukey's correction  
287 for multiple comparisons. The use of the respective statistical tests is indicated in the figure  
288 legends with p-values labeled at the individual statistically significant data points.

289

## 290 **Results**

291

292 Recent studies demonstrated an important role of liver macrophages in resolving bloodstream  
293 infections with *S. aureus* and revealed the potential of *S. aureus* to subvert this cell type as a  
294 privileged environmental niche [11a]. Yet, the role of macrophage plasticity as a potential  
295 determinant in the course of *S. aureus* infection needs to be elucidated.

296

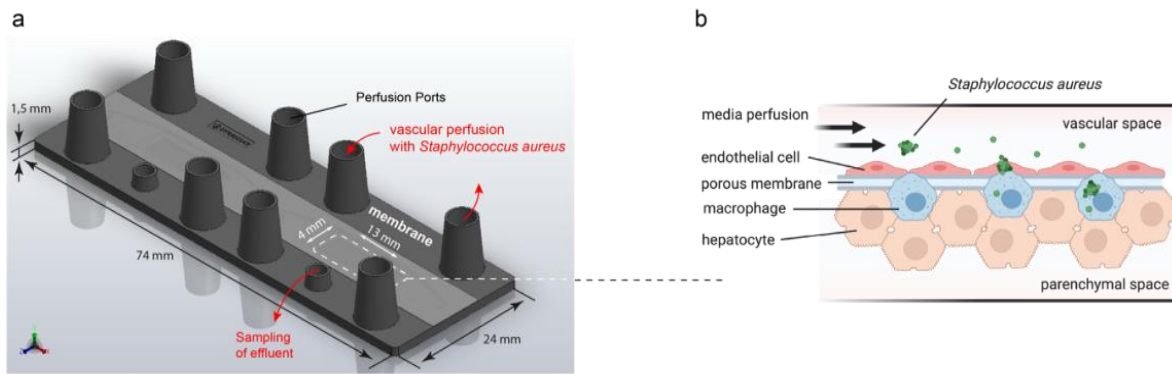

297

298 **Figure 1.** Drawing of the microfluidic perfused biochip for the culture of liver-on-chip. a) The microfluidic  
299 perfused chip has the format of a microscopic slide. It contains perfusion ports for the circulating medium  
300 to provide nutrition to cells cultured at the membrane suspended in each of the two cavities of the chip  
301 as recently described [18]. The effluent can be sampled under perfusion conditions via a sampling port.  
302 b) Scheme of the assembled cell layers in the liver on-chip. Endothelial cells are cultured at the top of  
303 the membrane and perfused by cell culture medium. At the opposite side of the membrane, hepatocytes  
304 are cultured. Macrophages are localized at the interface between the endothelial and the parenchymal  
305 cell layer formed by hepatocytes, as recently described [21]. For infection experiments, planktonic *S.*  
306 *aureus* were suspended in the cell culture medium perfused within the vascular space at the endothelial  
307 side of the liver-on-chip model.

308 The role of macrophages in pathogen persistence and dissemination was characterized in  
309 liver-on-chip cocultured with non-activated human macrophages (M0) or macrophages  
310 stimulated by IFN $\gamma$  creating an M1-like phenotype or with IL-4 inducing an M2-like phenotype  
311 (Figure 1, Supp. Fig. 1a). After 2 h post-infection (p.i.) we analyzed intracellular bacterial counts  
312 in endothelial cells, hepatocytes, and macrophages using fluorescence microscopy and  
313 automated image analysis (Supp. Fig. 2). Briefly, a custom-designed algorithm was  
314 implemented in the Imaris software to preprocess and segment Z-stacks of microscopy images  
315 based on fluorescence intensity. The cells (macrophages, endothelial cells, hepatocytes) were  
316 identified as 3D surfaces using fluorescence membrane labelling, whereas the bacteria were  
317 characterized as uniformly sized spheres defined by their intensity center. The relative location  
318 of the cells (endothelial vs. parenchymal) and of the bacteria (inside vs. outside vs. adherent  
319 to macrophages or endothelial cells and hepatocytes) were quantified as described in the

320 Methods section (Figures 2 and 3). The E-cadherin and macrophage labeling revealed the  
321 regular structure of the hepatocytes and the clear appearance of three liver macrophages in  
322 this field of view (Figure 2a). After segmentation and reconstruction in Imaris, the hepatocyte  
323 cell walls were represented both as 3D surfaces and as Cells objects (Figure 2b), from which  
324 the membrane were extracted and represented as a confluent cell layer (Figure 2c). The latter  
325 representation allowed the enclosed cell surfaces to be tested for bacterial content. Here the  
326 number of bacteria was determined by counting the engulfed Spots (uniform-diameter green  
327 spheres from Imaris in Figure 2c) per macrophage, used later to characterize the polarization-  
328 dependence of *S. aureus* uptake by M0, M1 and M2 macrophages. The distribution of high  
329 bacterial—content macrophages was not uniform, as shown by the clustering of yellow-to-red  
330 color-coded cells in Figure 2c.  
331



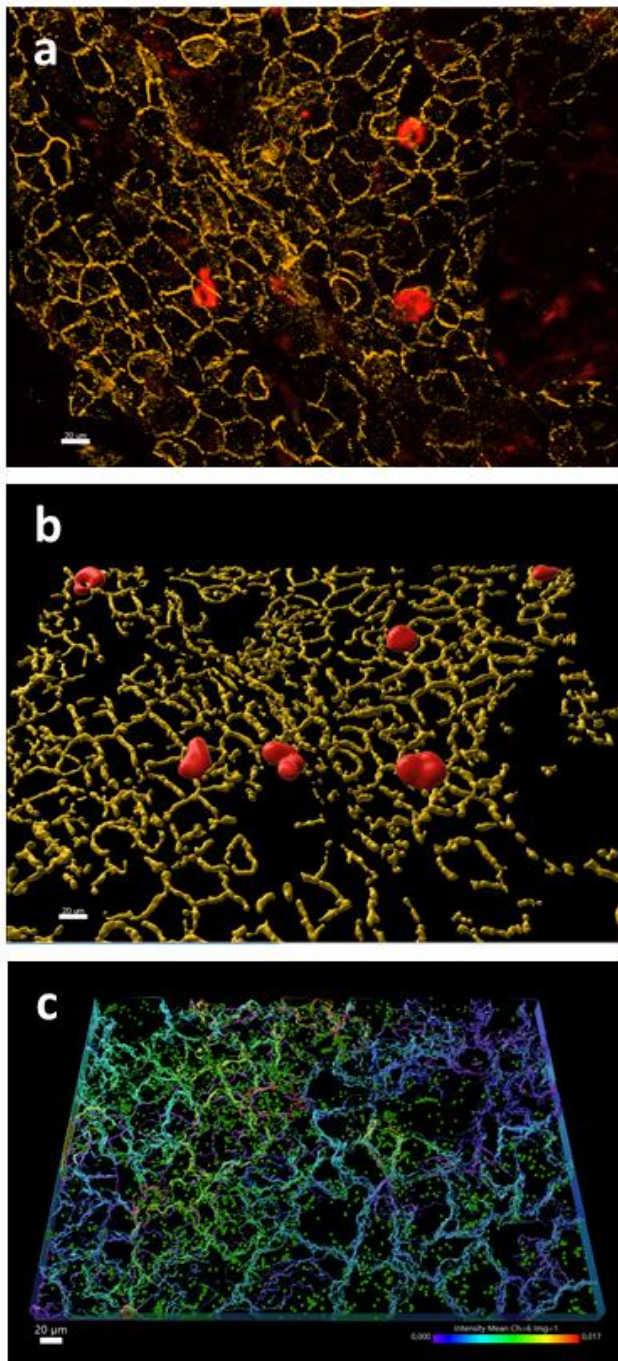

332

333 **Figure 2.** Illustrative processing steps of quantifying hepatocytes, macrophages, and *S.*  
334 *aureus*. The preprocessed (see Supplementary Figure 2) volume signals of the VE-cadherin  
335 (yellow) and macrophage (red) fluorescence channels (**a**) were segmented in Imaris, resulting  
336 in Surface objects in the corresponding colors (yellow: hepatocytes, red: liver macrophages)  
337 (**b**). The VE-cadherin labelled cells and the *S aureus* bacteria were also segmented as Cells  
338 objects (see Supplementary Figure 2), followed by exporting the membrane components (as  
339 Cells) and the bacteria (as Vesicles) from the Cells objects (**c**). The color coding of the cell

340 *membranes in (c) indicates the intensity of the green S. aureus fluorescence channel inside*  
341 *each individual endothelial cell (color scalebar in bottom right), thus characterizing the bacterial*  
342 *content of each cell. The S. aureus cells appear as green spots. The scalebars indicate 20  $\mu\text{m}$*   
343 *throughout.*

344

345 The endothelial and hepatic sides of the chips were identified based on the Z position of the  
346 segmented cells relative to the axial location of the scaffolding membrane, as shown in Figure  
347 1b. The membrane itself was not labelled, but it was possible to precisely identify its location  
348 by applying contrast stretching to the green *S. aureus* channel, inverting it, and then using the  
349 resulting bright disks that appeared in a narrow Z range in the Z slice signal to generate Spot  
350 objects that corresponded to the membrane pores (Figure 3a-b). This approach allowed a  
351 simple way to get a 3D map of all the membrane pores, thus precisely determining the side at  
352 which a given cell is located (Figure 3c-d). In the example in Figure 3c-d, three macrophages  
353 were identified and segmented using the lateral view (Figure 3c). When compared with the  
354 localization of the previously identified membrane in axial view, it became clear that two of  
355 three macrophages were located on the hepatic side of the chip, whereas the third immune  
356 cell was on the vascular side; all three macrophages were located close to the membrane  
357 (Figure 3d).

358

359 As the *S. aureus* cells were visualized as Spots after segmentation, the spatial location of the  
360 intensity center of the bacteria was determined precisely, whereas information about the exact  
361 shape of the pathogens was lost (Figure 3e; for technical details on how the Imaris parameters  
362 were set for the Spots and Surfaces objects and how these were utilized to measure infection,  
363 see [24]. This was a meaningful compromise, because the necessary optical resolution to  
364 observe the shape of individual bacteria was not available with the technology applied in this  
365 work. The segmented Spots were categorized according to their position: inside the endo- or  
366 epithelial cells or the macrophages, adherent to the cell membranes, or dissociated  
367 (Supplementary Figure 2 bottom right, Figure 3e). The macrophage and the *S. aureus* in the



368 example in Figure 3e illustrate how a typical spatial distribution of these cells look like: the  
369 majority of the bacteria were already phagocytosed by the macrophages (these are the  
370 magenta dots in Figure 3e), with a minority being attached to the macrophage surface  
371 (adherent pathogens, see the cyan spots in Figure 3e). The rest of the bacteria were classified  
372 as dissociated, i.e., being more than one micrometer away from any macrophage surface (see  
373 the silver spots in Figure 3e). This elaborate classification technique was utilized to quantify  
374 the number of intracellular bacteria when faced with immune cells of various polarization  
375 states.  
376

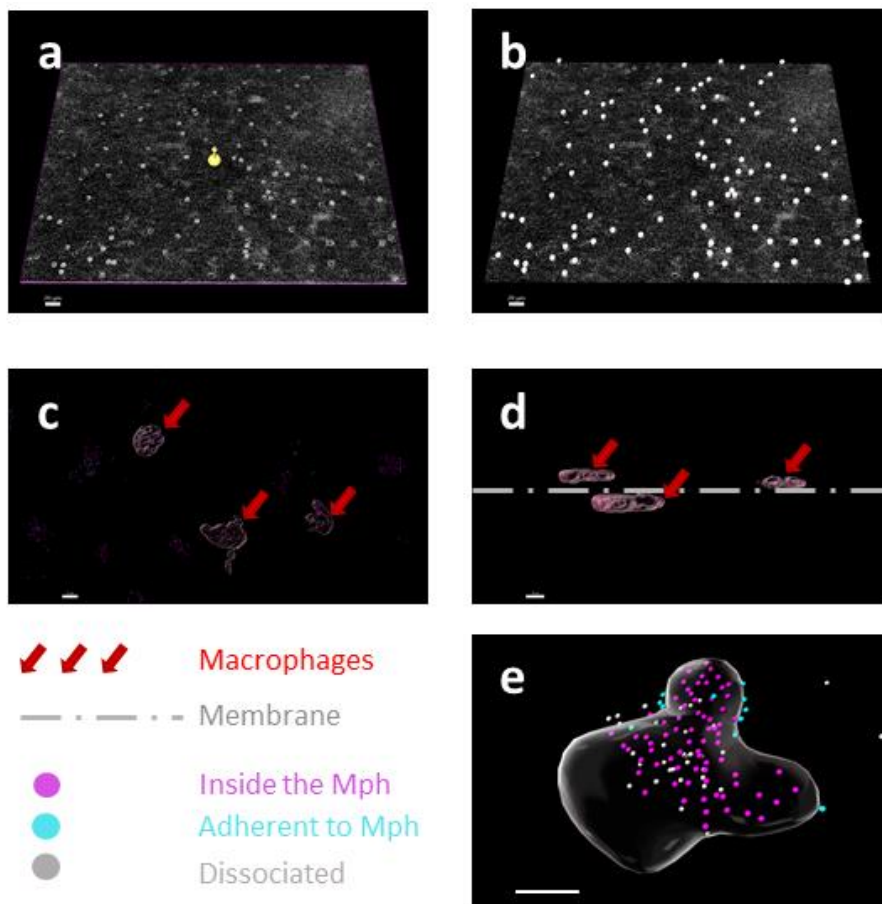

377  
378 **Figure 3.** Identifying the relative spatial localization of immune cells and bacteria. (a) The green  
379 fluorescence channel was inverted (see also Supplementary Figure 2), contrast stretched and  
380 viewed in Slice mode in Imaris. The Z layer shown in (a) corresponds to the approximate  
381 middle of the membrane pores (bright disks). The yellow object in the center of (a) indicates  
382 the Imaris Z-slicing tool. (b) The bright disks were segmented as Spots after filtering by

383 *intensity and size (a pore is 8  $\mu\text{m}$  in diameter) and were used to describe the location of each*  
384 *membrane pore (silver spheres). (c) Three macrophages were identified and segmented as*  
385 *Surfaces objects. (d) Their axial location was determined by comparing their Z position with*  
386 *that of the identified membrane pores (grey dashed-dotted horizontal line). The sideview*  
387 *shows that two of the macrophages were on the parenchymal side, whereas one was on the*  
388 *endothelial side of the membrane. (e) The locations of *S. aureus* cells relative to a macrophage*  
389 *are indicated by the color of the small spheres that illustrate the bacteria. The magenta spheres*  
390 *are bacteria that are inside the macrophage (the macrophage membrane appears as a grey*  
391 *glassy surface), the cyan spheres are adherent bacteria, whereas the silver spheres are*  
392 *dissociated pathogens that are more than one micrometer away from the macrophage surface.*  
393 *The scalebars in (a) and (b) indicate 20  $\mu\text{m}$ , those in (c) to (e) are 10  $\mu\text{m}$ .*

394

395 The assembly of these novel image quantification workflows was utilized to extract information  
396 from the 3D microscopy images taken 2h p.i. about the efficiency of macrophages in clearing  
397 out bacterial pathogens, the roles of endothelial and parenchymal cells in taking up bacteria,  
398 and the role of macrophage polarization in *S. aureus* uptake. Firstly, we could demonstrate the  
399 major role of macrophages in clearing *S. aureus* from the circulation in the liver model. Similar  
400 to *in vivo*, macrophages had a protective role by preventing the infection of endothelial cells  
401 and hepatocytes with *S. aureus*, which did not depend on the macrophage polarization pattern  
402 (Figure 4a, b). However, in the absence of macrophages, considerable high numbers of  
403 intracellular bacteria were detected within endothelial cells as well as hepatocytes. The vast  
404 majority of bacteria was detected in macrophages, with the highest bacterial counts found in  
405 M2 polarized macrophages 2 h p.i. as well as 48 h p.i. (Figure 4 c,d). The MOI was kept  
406 constant at the time of infection regardless of macrophage polarization, still bacterial counts  
407 were higher in M2 macrophages throughout the course of infection. Thus, the initial bacterial  
408 uptake rather the ability to differentially clear persisting bacteria among macrophage  
409 polarization conditions might determine the intracellular bacterial load 48h p.i.. Although not  
410 statistically significant, a similar trend was observed in 2D macrophage monocultures under

411 static conditions (Supplementary Figure 1b). We next studied the capability of *S. aureus* to  
 412 disseminate after intracellular persistence by analyzing planktonic bacteria at the vascular and  
 413 parenchymal side effluent (Supplementary Figure d). Dissemination of *S. aureus* was primarily  
 414 seen at the parenchymal side of the model. The polarization pattern of macrophages had no  
 415 significant impact on the dissemination rate, with only a few bacteria escaping from the liver  
 416 model (Figure 4e, f). The analysis of the formation of SCVs revealed a positive correlation with  
 417 the total amount of persisting bacteria 48 h p.i.. Importantly, SCV formation was not observed  
 418 in the 2D mono-cell culture of macrophages, indicating the contribution of other cell types in  
 419 this process (Figure 4g).  
 420

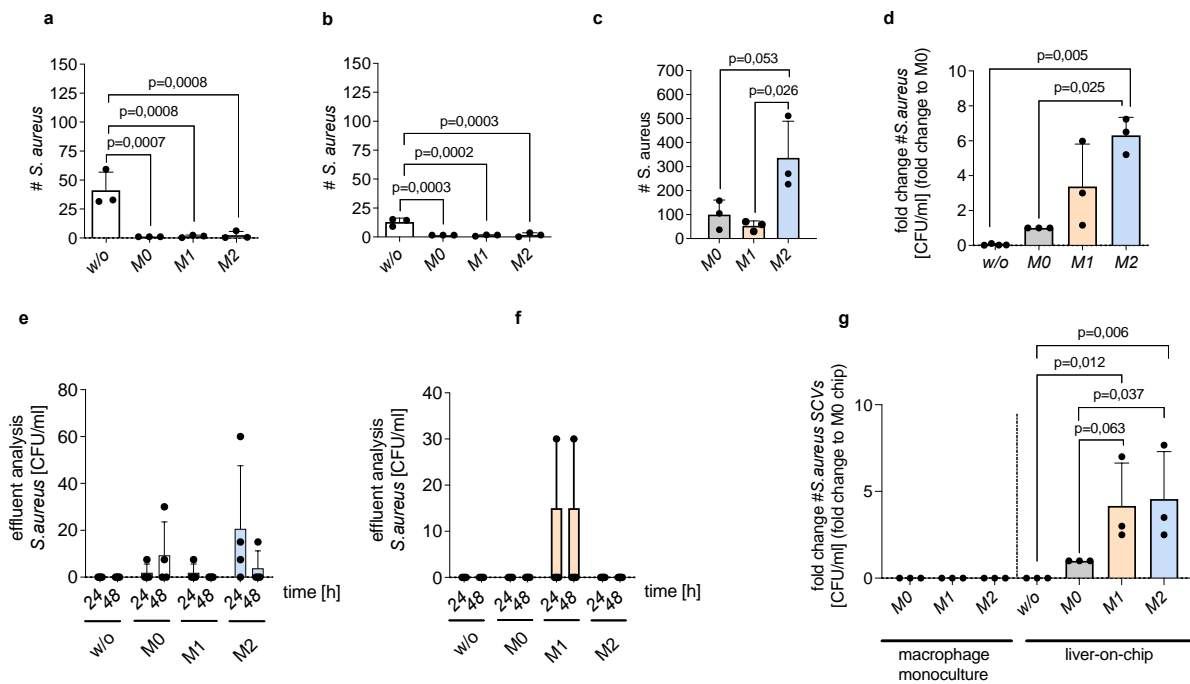

421  
 422 **Figure 4.** Uptake, persistence, dissemination, and SCV formation of *S. aureus* in liver-on-chip. a-c)  
 423 image analysis-based quantification of the number of persisting *S. aureus* per region of interest (ROI)  
 424 in a) endothelial cells; in b) hepatocytes or in c) macrophages of liver-on-chip without cocultured  
 425 macrophages (w/o) or in coculture with non-activated (M0), M1 or M2 polarized macrophages 2 h p.i..  
 426 At least 5 randomly selected ROIs per condition were analyzed. d-g) CFU counts 48 h p.i. of d) lysed  
 427 liver-on-chip; e-f) disseminated *S. aureus* within e) the parenchymal effluent, f) the vascular effluent. g)  
 428 CFU analysis of SCVs formed in macrophage monocultures or liver-on-chip (SCVs identified based on  
 429 colony size (Supp. Fig. 1c)). d, g) CFU counts were normalized as fold changes to the values of the M0

430 *condition per experiment and macrophage donor. a-g) Bars indicate the mean of values from three*  
431 *independent experiments, error bars indicate SD. Statistical analysis shows p-values of one-way*  
432 *ANOVA testing.*

433 Cytokine release profiles within the effluent from liver-on-chip validated an acute immune  
434 response to *S. aureus* infection with IL-1 $\beta$  levels increasing at 24 and 48 h p.i. in liver-on-chip  
435 containing macrophages. Similar trends were observed for the release of the cytokines IL-18,  
436 IL-6, TNF $\alpha$ , and IL-10 (Figure 5a-e). Except for the release of IL-6, where baseline cytokine  
437 levels were already detectable without cocultured macrophages, the immune response to *S.*  
438 *aureus* infection strongly depended on the presence of macrophages. Still, the initial  
439 macrophage polarization pattern at the time of infection had no significant effect on cytokine  
440 release. These results suggest that pre-infection macrophage polarization determines the  
441 number of *S. aureus* capable of infecting the cell but does not influence the immune response  
442 to intracellular persisting bacteria. Further, in liver-on-chip with M2 macrophages we observed  
443 a significant increase of lactate dehydrogenase (LDH) and aspartate aminotransferase (ASAT)  
444 release into the effluent suggesting loss of cellular integrity that was associated with a drop of  
445 the albumin synthesis rate 48h p.i., reflecting reduced hepatocyte metabolism (Figure 6a-c).

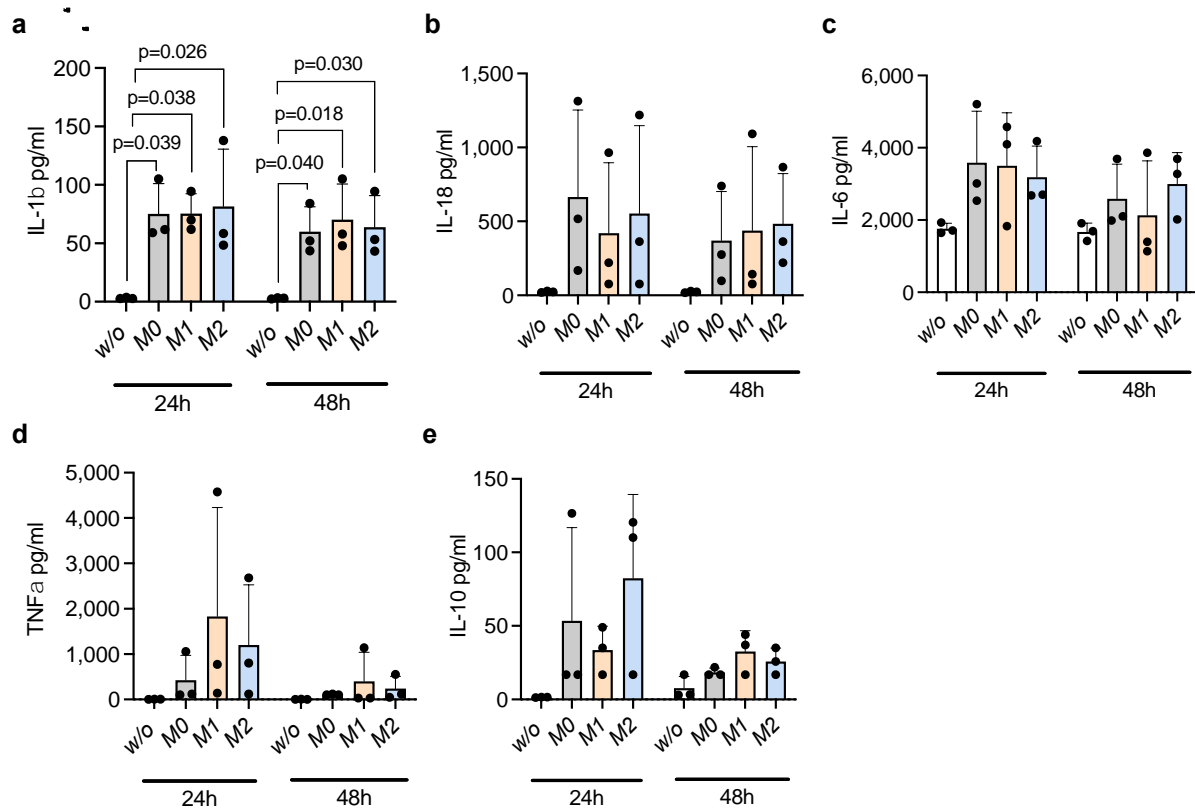

446

447

448 **Figure 5.** Cytokine profiles measured 24 or 48 h p.i. in the vascular effluent of liver-on-chip without  
449 cocultured macrophages (w/o) or in the presence of non-activated (M0), M1 polarized, or M2 polarized  
450 macrophages. a-e) Bars indicate the mean of values from three independent experiments, error bars  
451 indicate SD. Statistical analysis shows p-values of one-way ANOVA testing.

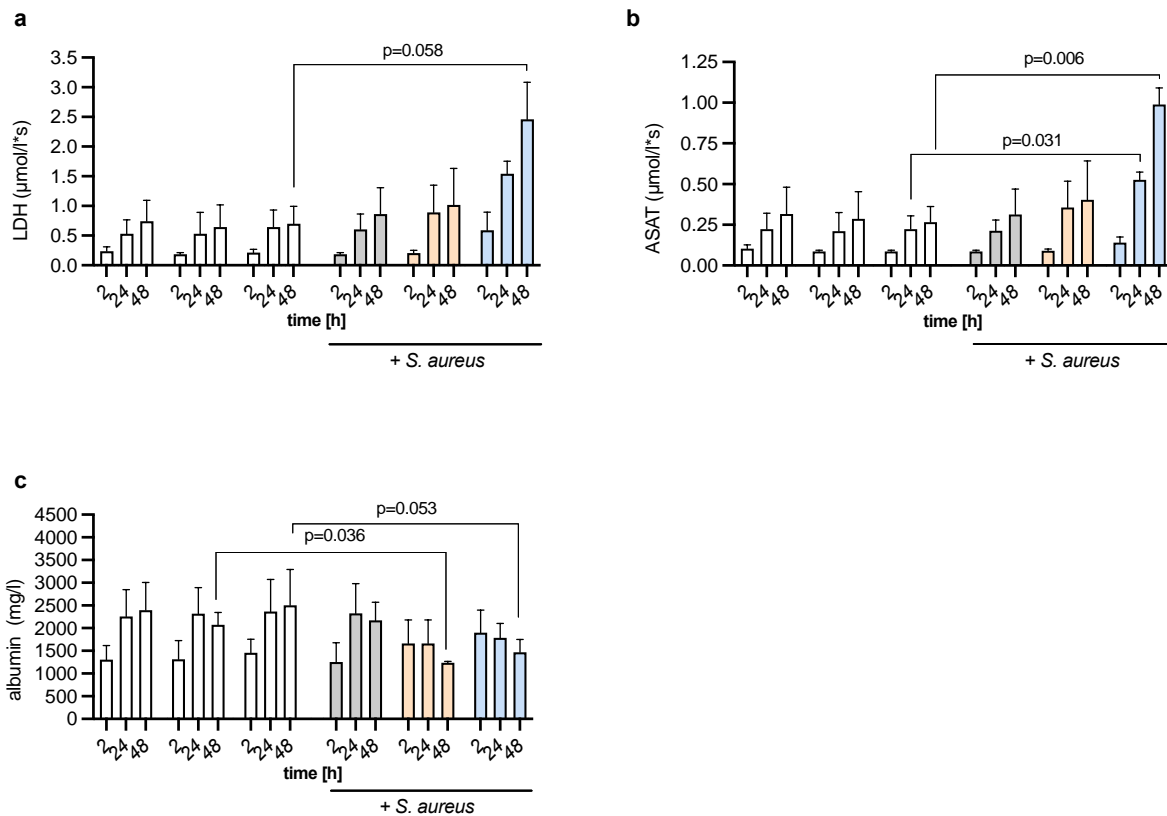

452

453 **Figure 6.** Effluent analysis of the release of lactate dehydrogenase (LDH), aspartate aminotransferase  
 454 (ASAT), or albumin at the parenchymal side of the liver-on-chip model 48 h p.i.. a-c) Bars indicate the  
 455 mean values from three independent experiments, error bars indicate SD. Statistical analysis shows p-  
 456 values of one-way ANOVA testing.

457 We next analyzed macrophage counts in liver-on-chip after infection. No differences were observed  
 458 2 h p.i. with respect to macrophage polarization stages. However, a declining number of M2  
 459 polarized macrophages was detected 48 h p.i. in infected liver-on-chip (Figure 7a, b). We then  
 460 asked whether the macrophage loss as a consequence of infection could be compensated by  
 461 recruiting monocytes from the circulation. Monocyte perfusion experiments proved an increased  
 462 monocyte adhesion rate upon infection compared to non-infected liver-on-chip (Figure 7c). This  
 463 observation underlines the importance of macrophages in orchestrating monocyte infiltration during  
 464 infection with *S. aureus*. In particular, in the presence of M0 macrophages, monocyte counts  
 465 infiltrated in the liver model were elevated 48 h p.i. compared to liver-on-chip without macrophages.  
 466 Interestingly, monocyte recruitment was diminished to basal levels in the presence of infected M2  
 467 macrophages similar to liver-on-chip without cocultured macrophages (Figure 7c, d). This finding  
 468 indicates that in the presence of M2 macrophages, the ability to replenish macrophage loss upon

469 infection is disturbed. We found no indication of bacterial uptake by recruited monocytes at sites of  
 470 infection, where intracellular presence of *S. aureus* was strictly restricted to macrophages (Figure  
 471 7e). Further, we did not detect viable bacteria by CFU assays in monocytes from the effluent of  
 472 infected liver-on-chip (data not shown).

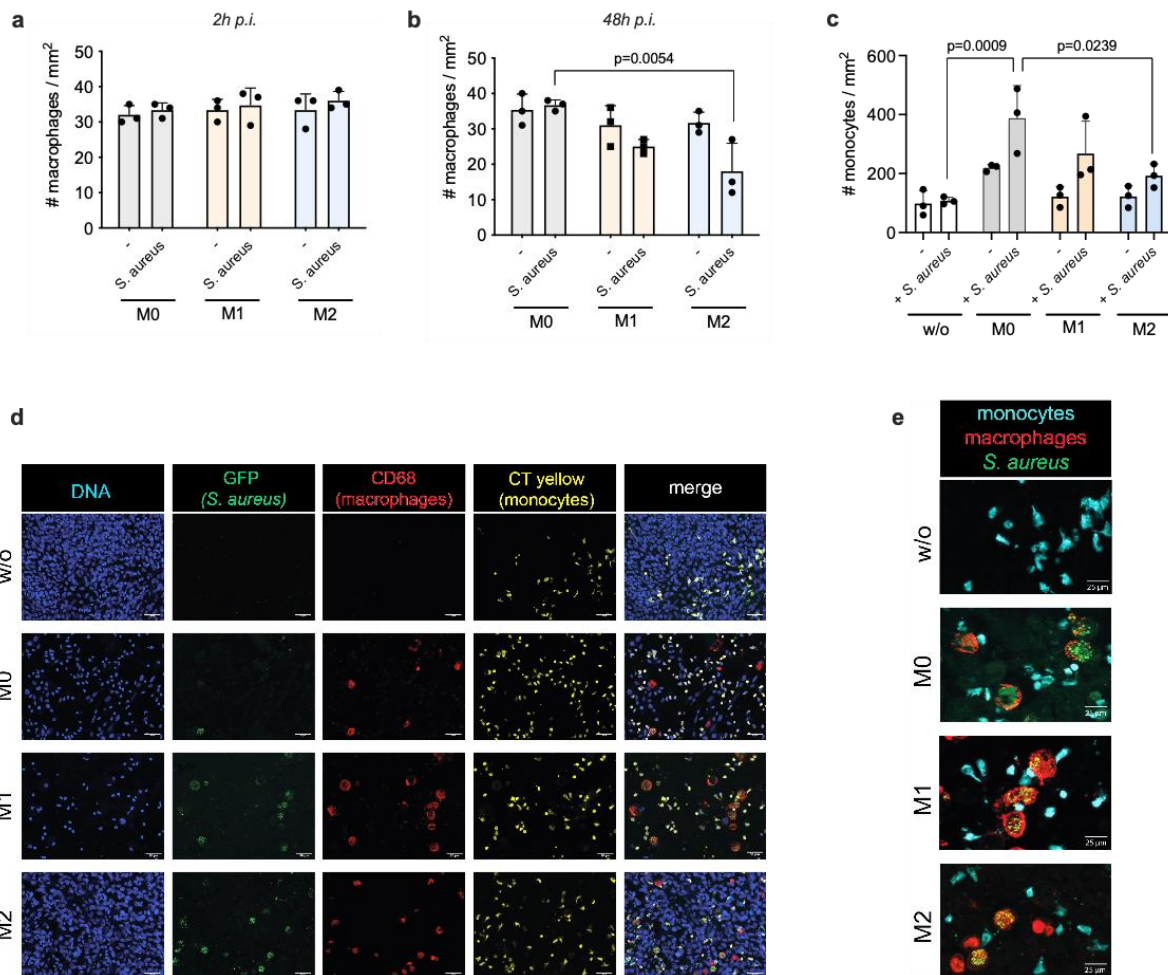

473

474 **Figure 7. Macrophages and monocytes count in liver-on-chip.** a-b) Number of macrophages per mm<sup>2</sup>  
 475 in liver-on-chip a) 2 h p.i. or b) 48 h p.i.; c) number of recruited monocytes per mm<sup>2</sup> 48 h p.i.. a-c) Image  
 476 analysis-based quantification of five randomly selected RIO per condition. d-e) Representative images  
 477 of monocyte recruitment experiments d) scale bar 50 μm; e) scale bar 20 μm. a-c) Bars indicate mean  
 478 values from three independent experiments, error bars indicate SD. Statistical analysis shows p-values  
 479 of one-way ANOVA testing.

480



## 481 Discussion

482

483 Macrophages play a central role in removing planktonic *S. aureus* from the bloodstream by the  
484 liver and kill bacteria after uptake by phagocytosis. For the first time, we were able to leverage  
485 a complex human liver-on-chip model with tailored image analysis procedures to follow these  
486 processes in vitro and demonstrate the prominent role of macrophages and its polarization on  
487 facilitating intracellular persistence and metabolic adaptation of *S. aureus* in a protected  
488 immunological niche.

489

490 Our results show that increased numbers of bacteria initially phagocytosed by macrophages  
491 result in higher amounts of living persisting bacteria capable of surviving by exploiting this cell  
492 type as a cellular niche, likely by exhaustion of antimicrobial functionality over time. This  
493 mechanisms contribute to the strategy of the pathogen to remain undetected by peripheral  
494 immune cells such as neutrophils [6d]. The limited capacity of intracellular killing by  
495 macrophages is the rate-limiting process in bacterial clearance. In this context, disturbed  
496 maturation of the phagosome and a decreased acidification with reduced activation of  
497 cathepsin D have been discussed to be associated with the failure of inducing apoptosis-  
498 associated bacterial killing in macrophages [11b]. Consequently, viable bacteria load further  
499 increases by ongoing phagocytosis and form a pool of adapted variants capable of lysing and  
500 re-infecting other macrophages [11b]. A recent study showed that also replacing the majority  
501 of the infectious burden with commensals could augment infection and trigger the formation of  
502 "proinfectious agents" as a result of finite macrophage clearing capacity [25]. In mice, this  
503 mechanism has been proven to contribute to the dissemination into other organs in the  
504 periphery, such as the kidneys [6d].

505

506 Recent studies revealed that various gram-negative and gram-positive bacteria induce similar  
507 transcriptional activity termed "core response to infection," related to M1 polarization  
508 [26]. However, other studies indicate that macrophages could respond to *S. aureus* exposure



509 differently, promoting pro-inflammatory M1 as well as anti-inflammatory M2 macrophage  
510 responses [27]. Experimentally, M1 or M2 polarization is often induced *in vitro* by cytokine  
511 stimulation of macrophage monocultures. However, single-cell type models neglect the  
512 complex microenvironment and the contribution of other cell types in the course of infection.  
513 Thus, macrophage monocultures might not entirely correlate to phenotypes found *in vivo* that  
514 constantly change over time depending on the tissue context and the stage of infection [28].  
515 Macrophage plasticity is very rapid and enables the cell to shape a dynamic  
516 immunomodulatory environment. The cells orchestrate the initial phase of inflammation and  
517 set the stage for later phases of infection with the resolution of inflammation and subsequent  
518 tissue remodeling [29]. Thus, *in vivo* macrophage activation is delineated as a continuum  
519 composed of multiple transient functional states between M1 and M2 in which the cell reversely  
520 adapts to its environment, which is formed by released growth factors and chemokines during  
521 acute infection and tissue repair [30]. In order to limit detrimental effects to the host tissue, an  
522 M1 to M2 polarization shift of macrophages is induced during sepsis in the transition from the  
523 acute "systemic inflammatory response syndrome" (SIRS) to the "compensatory anti-  
524 inflammatory response syndrome" (CARS) associated with immune tolerance to pathogens  
525 [31]. M2 macrophages have a potent capacity of phagocytosing cell debris, apoptotic and dead  
526 cells. Still, they are poor antigen-presenting cells which relates to their function in limiting the  
527 pro-inflammatory host response [32]. Patients suffering from chronic rhinosinusitis with nasal  
528 polyps show an increased *S. aureus* colonization of the nasal mucosa associated with an M2  
529 activation phenotype that is linked to decreased phagocytosis and an increased bacterial  
530 persistence [33]. Several studies demonstrated the ability of different pathogens to manipulate  
531 macrophage activation to neutralize antimicrobial effectors and to establish chronic infections.  
532 Intracellular persisting bacterial pathogens including *Mycobacterium tuberculosis*, *Salmonella*,  
533 *Coxiella burnetii*, and others have been reported to manipulate macrophage polarization,  
534 including reprogramming of macrophage polarization from M1 to M2 as a strategy to persist  
535 and to evade immune recognition, which favors the onset of chronic infections [26a, 32, 34].  
536

537 In our study, we could prove that macrophage polarization at the time of infection determines  
538 the load of intracellular bacteria already 2 h p.i.. Recent studies show that macrophages take  
539 up *S. aureus* via classical endocytosis within 1.5 h [6d]. In our human liver model, we found  
540 significantly higher numbers of viable intracellular bacteria in M2 polarized macrophages 48 h  
541 p.i.. This is likely an effect of the increased phagocytosis rate of M2 macrophages, which  
542 represents a hallmark of this macrophage phenotype [35]. In the liver model, increased  
543 numbers of M2 macrophage-persisting bacteria were associated with a significant loss of  
544 viable macrophages 48 h p.i. and increased cell death with reduced metabolic activity of  
545 hepatocytes, probably as a consequence of hepatocyte impairment by damage-associated  
546 molecular patterns released from dying macrophages.

547

548 *In vivo*, the loss of Kupffer cells led to a higher susceptibility and severity of *S. aureus* infections  
549 [12a]. Several reports have demonstrated that following *S. aureus* infection, monocytes are  
550 recruited to sites of infection as a result of an up-regulation of various cell adhesion molecules  
551 expressed by endothelial cells [36]. Increased monocyte recruitment is a mechanism to  
552 replenish macrophage loss and is important in the course of infection for efficient eradication  
553 of the pathogen. Significant recruitment of monocytes was observed in liver-on-chip models  
554 containing non-activated macrophages but was significantly impaired in the presence of M2  
555 polarized macrophages with higher bacterial loads. This highlights the role of functional  
556 macrophages in orchestrating monocyte recruitment in the course of infection and might further  
557 point to a mechanism that would allow *S. aureus* to prevent its eradication from the tissue by  
558 restricting monocyte infiltration and macrophage differentiation at sites of infection. Recently,  
559 it has been demonstrated in mice receiving intracellular viable *S. aureus* by injection of infected  
560 bone marrow-derived macrophages that these animals had a higher bacterial load in the  
561 kidney and liver compared to mice that received injection of similar amounts of planktonic *S.*  
562 *aureus* [37]. However, we found no viable bacteria been ingested by monocytes that migrated  
563 into the cell layers or remained within the effluent.

564

565 Although bacterial burden was significantly elevated in liver-on-chip with M2 macrophages, we  
566 found no indication of elevated dissemination into the effluent. Recently, animal models have  
567 shown that a small population of bacteria is enriched by recurring infection and cell lysis cycles  
568 of macrophages. This "population bottleneck" proposed by Pollitt et al. argues for the  
569 accumulation of selected variants fitter and better adapted to the specific microenvironment  
570 rather than the formation of new bacterial mutants [12a]. Similar effects might be responsible  
571 for the accumulation of bacteria within our liver model, where the dissemination of bacteria  
572 strictly relied on the presence of functional macrophages. We did not observe a correlation of  
573 increasing bacterial counts within macrophages with elevated release into the effluent. This  
574 fact might be considered a hint that persisting *S. aureus*, after host cell lysis, prefers to jump  
575 to other macrophages within the tissue due to a variant enrichment rather than disseminating  
576 into the effluent. Targeting such an adapted variant population of bacteria by tailored  
577 antimicrobial treatments will likely help to restrict bacterial dissemination and limit the relapsing  
578 capacity of *S. aureus* in chronic infections [11b]. Follow-up studies will look at more extended  
579 circulation and migration times of monocytes which would allow its differentiation to  
580 macrophages and will also address the role of neutrophil granulocytes as potential "trojan  
581 horses" for *S. aureus* to systemically disseminate to other organs [38].

582

583 A common problem in treating macrophage persisting *S. aureus* variants is the fact that the  
584 antibiotic of choice, vancomycin, which is frequently used to eradicate MRSA infections, cannot  
585 penetrate the membrane of macrophages to kill persisting bacteria [9c]. The problem in treating  
586 these infections is further complicated by the ability of *S. aureus* to enter the dormant SCV  
587 phenotype characterized by a reduced metabolic activity which significantly limits the ability of  
588 the antibiotic to interfere with bacterial survival [13, 39]. SCV formation has been reported from  
589 the USA300 and other strains as a strategy to survive in abscesses by upregulation of adhesin  
590 expression and downregulation of bacterial metabolism with reduced expression of virulence  
591 factors facilitating an improved intracellular persistence and the evasion of immune cell  
592 detection [13, 39]. Further, SCVs could prevent induction of hypoxia-inducible factor, an

593 important sensor for intracellular persisting pathogens, and thereby circumvent an appropriate  
594 antimicrobial response favoring abscess formation [40]. We observed a higher number of  
595 SCVs due to increased bacterial loads within macrophages cocultured in liver-on-chip.  
596 Interestingly, SCV formation was not observed in macrophage monocultures obtained from the  
597 same donors. This agrees with reports from another group reporting no elevated SCV  
598 formation in macrophages differentiated from THP-1 cells by phorbol 12-myristate 13-acetate  
599 stimulation within five days in a mono-cell culture [41]. Further, monocyte-derived  
600 macrophages in mono-cultures do not undergo induction of apoptosis or necrosis during *S.*  
601 *aureus* persistence and remain functional for several days after stimulation [6d]. Although we  
602 obtained similar results 48 p.i. of macrophages in the monoculture, we overserved significant  
603 cell loss of M2 macrophages in liver-on-chip associated with increased formation of SCVs.  
604 These results imply that signals from additional cell types are required to create a milieu  
605 supportive for *S. aureus* persistence within M2 macrophages.

606

607 The translational relevance of our findings is underlined by several studies reporting that *S.*  
608 *aureus* infections are an important clinical complication in patients with chronic liver diseases  
609 such as fibrosis. In these patients, bacteremia is the most common type of *S. aureus* infection  
610 and is associated with a high mortality rate that is higher compared to any other disease  
611 coinciding with a *S. aureus* infection [42]. In particular, cirrhosis has been identified as an  
612 independent risk factor for bloodstream infections in patients with hospital-acquired pneumonia  
613 caused by *S. aureus* [43]. Chronic liver disease is often linked to higher counts of M2 polarized  
614 macrophages in the liver [44] that, according to our study, have impaired bacterial clearance  
615 capacity, which results in higher bacterial loads and increased frequency of SCV phenotype  
616 switching. This adaption by the pathogen to the microenvironment under infection conditions  
617 enables it to hide from immune cell detection and limits the host's options to eradicate  
618 persisting infections. In addition, the impaired replenishment of macrophages by circulating  
619 monocytes observed *in vitro* after the infection-related loss of M2 macrophages may contribute  
620 to bacterial persistence within the liver *in vivo*. Our study's limitation consists of the limited

621 number of donors due to challenging logistics in cell sourcing of primary monocytes and the  
622 need to use different cell donors for tissue engineering of the respective cell types to assemble  
623 liver-on-chip models. Future studies should leverage human-induced pluripotent cells as a  
624 cellular source of individual cell types to create isogenic tissue models that reflect individual  
625 donor-specific genetic backgrounds [45]. In this proof-of-concept study, we could demonstrate  
626 for the first time the potential of liver-on-chip to study bacterial infection and persistence  
627 mechanisms in macrophages. Future studies with advanced microphysiological models will  
628 allow higher sample numbers to provide a more detailed insight into the mechanisms of  
629 adaption of *S. aureus* to environmental cues and its strategy to persist and disseminate within  
630 the human liver.

631

#### 632 **Author Contributions**

633 F.S., S.C., M.G., A.S. performed experiments and analyzed data. Z.C. and M.T.F. developed  
634 strategies and implemented algorithms for the image-based quantification of *S. aureus*.  
635 B.G.J.S. provided GFP-expressing *S. aureus*. M.T.F., B.L., L.T., O.W., and A.S.M. planned  
636 and supervised experiments. A.S.M. designed the study and wrote the manuscript. F.S., Z.C.,  
637 S.C., M.G., A.S., B.G.J.S., O.W., M.T.F., B.L., L.T., A.S.M critically revised the manuscript.

638

#### 639 **Author Contributions**

640 The Deutsche Forschungsgemeinschaft financially supported this work under grant number  
641 MO 2968/1-1 to A.S.M. and grant number 1618/5-1 to B.L., and by the Cluster of Excellence  
642 “Balance of the Microverse” under Germany’s Excellence Strategy - EXC 2051 - Project-ID  
643 690 390713860 to M.T.F., O.W., B.L., L.T., and A.S.M. The work was further financially  
644 supported by the Collaborative Research Center PolyTarget 1278 (project number 316213987)  
645 to M.T.F., O.W. and A.S.M. and the German Ministry for Education and Research (BMBF)  
646 under grant no. 01EO1002 (CSCC) to B.L., L.T., and A.S.M; and grant no. 01EC1901B  
647 (MESINFLAME) to B.L. and L.T.

648

649 **Conflicts of interest**

650 A.S.M. holds equity in and consults Dynamic42 GmbH.

651 **References**

- 652 [1] a) S. Y. Tong, J. S. Davis, E. Eichenberger, T. L. Holland, V. G. Fowler, Jr., *Clin*  
653 *Microbiol Rev* **2015**, 28 (3), 603, <https://doi.org/10.1128/CMR.00134-14>; b) F. D. Lowy, *N*  
654 *Engl J Med* **1998**, 339 (8), 520, <https://doi.org/10.1056/NEJM199808203390806>.
- 655 [2] B. Duerden, C. Fry, A. P. Johnson, M. H. Wilcox, *Open Forum Infect Dis* **2015**, 2 (2),  
656 ofv035, <https://doi.org/10.1093/ofid/ofv035>.
- 657 [3] a) H. Boucher, L. G. Miller, R. R. Razonable, *Clin Infect Dis* **2010**, 51 Suppl 2, S183,  
658 <https://doi.org/10.1086/653519>; b) S. J. van Hal, S. O. Jensen, V. L. Vaska, B. A. Espedido,  
659 D. L. Paterson, I. B. Gosbell, *Clin Microbiol Rev* **2012**, 25 (2), 362,  
660 <https://doi.org/10.1128/CMR.05022-11>.
- 661 [4] a) J. R. Mediavilla, L. Chen, B. Mathema, B. N. Kreiswirth, *Curr Opin Microbiol* **2012**,  
662 15 (5), 588, <https://doi.org/10.1016/j.mib.2012.08.003>; b) D. J. Diekema, S. S. Richter, K. P.  
663 Heilmann, C. L. Dohrn, F. Riahi, S. Tendolkar, J. S. McDanel, G. V. Doern, *Infect Control*  
664 *Hosp Epidemiol* **2014**, 35 (3), 285, <https://doi.org/10.1086/675283>.
- 665 [5] R. K. Kota, H. B. Kolla, P. N. Reddy, N. K. Kalagatur, S. K. Samudrala, *Appl Microbiol*  
666 *Biotechnol* **2021**, <https://doi.org/10.1007/s00253-021-11609-z>.
- 667 [6] a) O. Vesga, M. C. Groeschel, M. F. Otten, D. W. Brar, J. M. Vann, R. A. Proctor, *J*  
668 *Infect Dis* **1996**, 173 (3), 739, <https://doi.org/10.1093/infdis/173.3.739>; b) C. von Eiff, K.  
669 Becker, D. Metze, G. Lubritz, J. Hockmann, T. Schwarz, G. Peters, *Clin Infect Dis* **2001**, 32  
670 (11), 1643, <https://doi.org/10.1086/320519>; c) S. Clement, P. Vaudaux, P. Francois, J.  
671 Schrenzel, E. Huggler, S. Kampf, C. Chaponnier, D. Lew, J. S. Lacroix, *J Infect Dis* **2005**,  
672 192 (6), 1023, <https://doi.org/10.1086/432735>; d) M. Kubica, K. Guzik, J. Koziel, M. Zarebski,  
673 W. Richter, B. Gajkowska, A. Golda, A. Maciag-Gudowska, K. Brix, L. Shaw, T. Foster, J.  
674 Potempa, *PLoS One* **2008**, 3 (1), e1409, <https://doi.org/10.1371/journal.pone.0001409>; e) L.  
675 Tuchscher, B. Löffler, R. A. Proctor, *Front Microbiol* **2020**, 11, 1028,  
676 <https://doi.org/10.3389/fmicb.2020.01028>; f) A. Siegmund, M. A. Afzal, F. Tetzlaff, D.  
677 Keinhorster, F. Gratani, K. Paprotka, M. Westermann, S. Nietzsche, C. Wolz, M. Fraunholz,  
678 C. A. Hubner, B. Löffler, L. Tuchscher, *Virulence* **2021**, 12 (1), 1186,  
679 <https://doi.org/10.1080/21505594.2021.1910455>.
- 680 [7] a) A. H. Bartlett, K. G. Hulten, *Pediatr Infect Dis J* **2010**, 29 (9), 860,  
681 <https://doi.org/10.1097/INF.0b013e3181ef2477>; b) P. Yoong, V. J. Torres, *Curr Opin*  
682 *Microbiol* **2013**, 16 (1), 63, <https://doi.org/10.1016/j.mib.2013.01.012>; c) M. Otto, *Annu Rev*  
683 *Microbiol* **2010**, 64, 143, <https://doi.org/10.1146/annurev.micro.112408.134309>.
- 684 [8] a) L. J. Dixon, M. Barnes, H. Tang, M. T. Pritchard, L. E. Nagy, *Compr Physiol* **2013**,  
685 3 (2), 785, <https://doi.org/10.1002/cphy.c120026>; b) M. Bilzer, F. Roggel, A. L. Gerbes, *Liver*  
686 *Int* **2006**, 26 (10), 1175, <https://doi.org/10.1111/j.1478-3231.2006.01342.x>.
- 687 [9] a) G. E. Thwaites, V. Gant, *Nat Rev Microbiol* **2011**, 9 (3), 215,  
688 <https://doi.org/10.1038/nrmicro2508>; b) V. G. Fowler, Jr., M. K. Olsen, G. R. Corey, C. W.  
689 Woods, C. H. Cabell, L. B. Reller, A. C. Cheng, T. Dudley, E. Z. Oddone, *Arch Intern Med*  
690 **2003**, 163 (17), 2066, <https://doi.org/10.1001/archinte.163.17.2066>; c) B. G. Surewaard, J. F.  
691 Deniset, F. J. Zemp, M. Amrein, M. Otto, J. Conly, A. Omri, R. M. Yates, P. Kubes, *J Exp*  
692 *Med* **2016**, 213 (7), 1141, <https://doi.org/10.1084/jem.20160334>.



- 693 [10] D. E. Rogers, *J Exp Med* **1956**, 103 (6), 713, <https://doi.org/10.1084/jem.103.6.713>.
- 694 [11] a) R. S. Flannagan, B. Heit, D. E. Heinrichs, *Cell Microbiol* **2016**, 18 (4), 514,  
695 <https://doi.org/10.1111/cmi.12527>; b) J. Jubrail, P. Morris, M. A. Bewley, S. Stoneham, S. A.  
696 Johnston, S. J. Foster, A. A. Peden, R. C. Read, H. M. Marriott, D. H. Dockrell, *Cell Microbiol*  
697 **2016**, 18 (1), 80, <https://doi.org/10.1111/cmi.12485>.
- 698 [12] a) E. J. G. Pollitt, P. T. Szkuta, N. Burns, S. J. Foster, *PLoS Pathog* **2018**, 14 (6),  
699 e1007112, <https://doi.org/10.1371/journal.ppat.1007112>; b) S. K. Jorch, B. G. Surewaard, M.  
700 Hossain, M. Peiseler, C. Deppermann, J. Deng, A. Bogoslawski, F. van der Wal, A. Omri, M.  
701 J. Hickey, P. Kubes, *J Clin Invest* **2019**, 129 (11), 4643, <https://doi.org/10.1172/JCI127286>.
- 702 [13] R. A. Proctor, A. Kriegeskorte, B. C. Kahl, K. Becker, B. Loffler, G. Peters, *Front Cell*  
703 *Infect Microbiol* **2014**, 4, 99, <https://doi.org/10.3389/fcimb.2014.00099>.
- 704 [14] R. A. Proctor, P. van Langevelde, M. Kristjansson, J. N. Maslow, R. D. Arbeit, *Clin*  
705 *Infect Dis* **1995**, 20 (1), 95, <https://doi.org/10.1093/clinids/20.1.95>.
- 706 [15] S. Cao, D. L. Huseby, G. Brandis, D. Hughes, *mBio* **2017**, 8 (3),  
707 <https://doi.org/10.1128/mBio.00358-17>.
- 708 [16] D. Y. Vogel, J. E. Glim, A. W. Stavenuiter, M. Breur, P. Heijnen, S. Amor, C. D.  
709 Dijkstra, R. H. Beelen, *Immunobiology* **2014**, 219 (9), 695,  
710 <https://doi.org/10.1016/j.imbio.2014.05.002>.
- 711 [17] A. Sica, M. Erreni, P. Allavena, C. Porta, *Cell Mol Life Sci* **2015**, 72 (21), 4111,  
712 <https://doi.org/10.1007/s00018-015-1995-y>.
- 713 [18] M. Raasch, K. Rennert, T. Jahn, S. Peters, T. Henkel, O. Huber, I. Schulz, H. Becker,  
714 S. Lorkowski, H. Funke, A. Mosig, *Biofabrication* **2015**, 7 (1), 015013,  
715 <https://doi.org/10.1088/1758-5090/7/1/015013>.
- 716 [19] E. A. Jaffe, R. L. Nachman, C. G. Becker, C. R. Minick, *J Clin Invest* **1973**, 52 (11),  
717 2745, <https://doi.org/10.1172/JCI107470>.
- 718 [20] P. Gripon, S. Rumin, S. Urban, J. Le Seyec, D. Glaise, I. Cannie, C. Guyomard, J.  
719 Lucas, C. Trepo, C. Guguen-Guillouzo, *Proc Natl Acad Sci U S A* **2002**, 99 (24), 15655,  
720 <https://doi.org/10.1073/pnas.232137699>.
- 721 [21] K. Rennert, S. Steinborn, M. Groger, B. Ungerbock, A. M. Jank, J. Ehgartner, S.  
722 Nietzsche, J. Dinger, M. Kiehntopf, H. Funke, F. T. Peters, A. Lupp, C. Gartner, T. Mayr, M.  
723 Bauer, O. Huber, A. S. Mosig, *Biomaterials* **2015**, 71, 119,  
724 <https://doi.org/10.1016/j.biomaterials.2015.08.043>.
- 725 [22] S. Mosig, K. Rennert, S. Krause, J. Kzhyshkowska, K. Neunubel, R. Heller, H. Funke,  
726 *FASEB J* **2009**, 23 (3), 866, <https://doi.org/10.1096/fj.08-118240>.
- 727 [23] M. Maurer, M. S. Gresnigt, A. Last, T. Wollny, F. Berlinghof, R. Pospich, Z.  
728 Cseresnyes, A. Medyukhina, K. Graf, M. Groger, M. Raasch, F. Siwczak, S. Nietzsche, I. D.  
729 Jacobsen, M. T. Figge, B. Hube, O. Huber, A. S. Mosig, *Biomaterials* **2019**, 220, 119396,  
730 <https://doi.org/10.1016/j.biomaterials.2019.119396>.
- 731 [24] S. Deinhardt-Emmer, K. Rennert, E. Schicke, Z. Cseresnyes, M. Windolph, S.  
732 Nietzsche, R. Heller, F. Siwczak, K. F. Haupt, S. Carlstedt, M. Schacke, M. T. Figge, C.  
733 Ehrhardt, B. Loffler, A. S. Mosig, *Biofabrication* **2020**, 12 (2), 025012,  
734 <https://doi.org/10.1088/1758-5090/ab7073>.

- 735 [25] E. Boldock, B. G. J. Surewaard, D. Shamarina, M. Na, Y. Fei, A. Ali, A. Williams, E. J.  
736 G. Pollitt, P. Szkuta, P. Morris, T. K. Prajsnar, K. D. McCoy, T. Jin, D. H. Dockrell, J. A. G.  
737 van Strijp, P. Kubes, S. A. Renshaw, S. J. Foster, *Nat Microbiol* **2018**, 3 (8), 881,  
738 <https://doi.org/10.1038/s41564-018-0198-3>.
- 739 [26] a) M. Benoit, B. Desnues, J. L. Mege, *J Immunol* **2008**, 181 (6), 3733,  
740 <https://doi.org/10.4049/jimmunol.181.6.3733>; b) G. Galli, M. Saleh, *Front Cell Infect Microbiol*  
741 **2020**, 10, 607650, <https://doi.org/10.3389/fcimb.2020.607650>.
- 742 [27] O. Werz, J. Gerstmeier, S. Libreros, X. De la Rosa, M. Werner, P. C. Norris, N.  
743 Chiang, C. N. Serhan, *Nat Commun* **2018**, 9 (1), 59, [https://doi.org/10.1038/s41467-017-](https://doi.org/10.1038/s41467-017-02538-5)  
744 [02538-5](https://doi.org/10.1038/s41467-017-02538-5).
- 745 [28] M. Nahrendorf, F. K. Swirski, *Circ Res* **2016**, 119 (3), 414,  
746 <https://doi.org/10.1161/CIRCRESAHA.116.309194>.
- 747 [29] a) F. Porcheray, S. Viaud, A. C. Rimaniol, C. Leone, B. Samah, N. Dereuddre-  
748 Bosquet, D. Dormont, G. Gras, *Clin Exp Immunol* **2005**, 142 (3), 481,  
749 <https://doi.org/10.1111/j.1365-2249.2005.02934.x>; b) J. Dalli, C. Serhan, *Microbiol Spectr*  
750 **2016**, 4 (3), <https://doi.org/10.1128/microbiolspec.MCHD-0001-2014>.
- 751 [30] C. M. Horn, T. Kielian, *Front Immunol* **2020**, 11, 621750,  
752 <https://doi.org/10.3389/fimmu.2020.621750>.
- 753 [31] a) D. J. Stearns-Kurosawa, M. F. Osuchowski, C. Valentine, S. Kurosawa, D. G.  
754 Remick, *Annu Rev Pathol* **2011**, 6, 19, [https://doi.org/10.1146/annurev-pathol-011110-](https://doi.org/10.1146/annurev-pathol-011110-130327)  
755 [130327](https://doi.org/10.1146/annurev-pathol-011110-130327); b) Y. C. Liu, X. B. Zou, Y. F. Chai, Y. M. Yao, *Int J Biol Sci* **2014**, 10 (5), 520,  
756 <https://doi.org/10.7150/ijbs.8879>.
- 757 [32] J. D. Thiriout, Y. B. Martinez-Martinez, J. J. Endsley, A. G. Torres, *Pathog Dis* **2020**, 78  
758 (1), <https://doi.org/10.1093/femspd/ftaa009>.
- 759 [33] O. Krysko, G. Holtappels, N. Zhang, M. Kubica, K. Deswarte, L. Derycke, S. Claeys,  
760 H. Hammad, G. G. Brusselle, P. Vandenabeele, D. V. Krysko, C. Bachert, *Allergy* **2011**, 66  
761 (3), 396, <https://doi.org/10.1111/j.1398-9995.2010.02498.x>.
- 762 [34] E. Gracey, A. Lin, A. Akram, B. Chiu, R. D. Inman, *PLoS One* **2013**, 8 (8), e69421,  
763 <https://doi.org/10.1371/journal.pone.0069421>.
- 764 [35] a) D. Schulz, Y. Severin, V. R. T. Zanotelli, B. Bodenmiller, *Sci Rep* **2019**, 9 (1), 1925,  
765 <https://doi.org/10.1038/s41598-018-38127-9>; b) U. Jaggi, M. Yang, H. H. Matundan, S.  
766 Hirose, P. K. Shah, B. G. Sharifi, H. Ghiasi, *PLoS Pathog* **2020**, 16 (10), e1008971,  
767 <https://doi.org/10.1371/journal.ppat.1008971>.
- 768 [36] H. Beekhuizen, J. S. van de Gevel, B. Olsson, I. J. van Benten, R. van Furth, *J*  
769 *Immunol* **1997**, 158 (2), 774.
- 770 [37] B. Tosetti, B. Ward, D. Grumme, M. Herb, M. Schramm, O. Utermohlen, L. C.  
771 Heukamp, M. Kronke, O. Krut, *Front Immunol* **2021**, 12, 633629,  
772 <https://doi.org/10.3389/fimmu.2021.633629>.
- 773 [38] a) H. D. Gresham, J. H. Lowrance, T. E. Caver, B. S. Wilson, A. L. Cheung, F. P.  
774 Lindberg, *J Immunol* **2000**, 164 (7), 3713, <https://doi.org/10.4049/jimmunol.164.7.3713>; b) E.  
775 G. Voza, M. E. Mulcahy, R. M. McLoughlin, *Front Immunol* **2021**, 12, 667387,  
776 <https://doi.org/10.3389/fimmu.2021.667387>.



- 777 [39] L. Tuchscher, V. Heitmann, M. Hussain, D. Viemann, J. Roth, C. von Eiff, G. Peters,  
778 K. Becker, B. Löffler, *J Infect Dis* **2010**, 202 (7), 1031, <https://doi.org/10.1086/656047>.
- 779 [40] a) N. Werth, C. Beerlage, C. Rosenberger, A. S. Yazdi, M. Edelmann, A. Amr, W.  
780 Bernhardt, C. von Eiff, K. Becker, A. Schafer, A. Peschel, V. A. Kempf, *PLoS One* **2010**, 5  
781 (7), e11576, <https://doi.org/10.1371/journal.pone.0011576>; b) C. Beerlage, J. Greb, D.  
782 Kretschmer, M. Assaggaf, P. C. Trackman, M. L. Hansmann, M. Bonin, J. A. Eble, A.  
783 Peschel, B. Brune, V. A. Kempf, *Infect Immun* **2013**, 81 (7), 2562,  
784 <https://doi.org/10.1128/IAI.00302-13>.
- 785 [41] S. M. Stoneham, D. M. Cantillon, S. J. Waddell, M. J. Llewelyn, *Front Microbiol* **2020**,  
786 11, 1300, <https://doi.org/10.3389/fmicb.2020.01300>.
- 787 [42] C. I. Kang, J. H. Song, K. S. Ko, D. R. Chung, K. R. Peck, G. Asian Network for  
788 Surveillance of Resistant Pathogens Study, *Liver Int* **2010**, 30 (9), 1333,  
789 <https://doi.org/10.1111/j.1478-3231.2010.02270.x>.
- 790 [43] a) H. P. Wu, C. M. Chu, C. Y. Lin, C. C. Yu, C. C. Hua, T. J. Yu, Y. C. Liu, *Pulm Med*  
791 **2016**, 2016, 4706150, <https://doi.org/10.1155/2016/4706150>; b) M. Brandolini, M. Corbella,  
792 A. De Silvestri, C. Tinelli, G. Albonico, R. Albertini, S. Ludovisi, R. Bruno, P. Marone, L.  
793 Minoli, E. Seminari, *Infection* **2015**, 43 (5), 561, <https://doi.org/10.1007/s15010-015-0794-6>.
- 794 [44] Q. F. Zheng, L. Bai, Z. P. Duan, Y. P. Han, S. J. Zheng, Y. Chen, J. S. Li, *World J*  
795 *Gastroenterol* **2017**, 23 (20), 3655, <https://doi.org/10.3748/wjg.v23.i20.3655>.
- 796 [45] M. Raasch, E. Fritsche, A. Kurtz, M. Bauer, A. S. Mosig, *Adv Drug Deliv Rev* **2019**,  
797 140, 51, <https://doi.org/10.1016/j.addr.2018.06.008>.  
798
